# Supplementary material for: Uncertainty Evaluation of Soil Heavy Metal(loid) Pollution and Health Risk in Hunan Province: A Geographic Detector with Monte Carlo Simulation
Source: MDPI journal article supplement (doi:10.3390/toxics11121006), 2023-12-08
Supplement: s1 [file s1]

# Supplementary Materials: Uncertainty Evaluation of Soil Heavy Metal(loid) Pollution and Health Risk in Hunan Province: A Geographic Detector with Monte Carlo Simulation

Baoyi Zhang, Yingcai Su, Syed Yasir Ali Shah and Lifang Wang

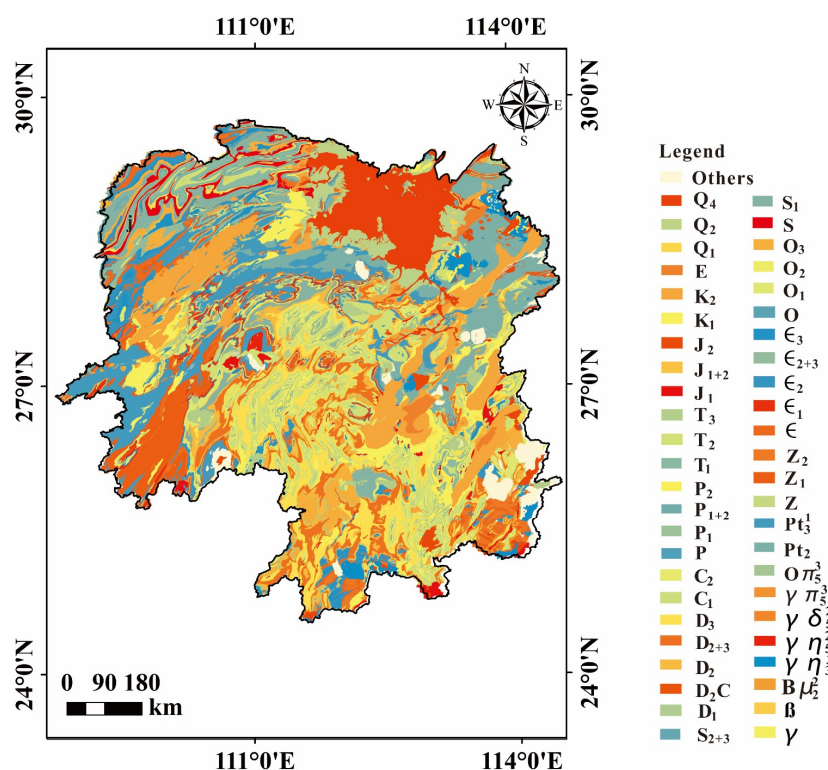

**Figure S1.** Geological map of Hunan Province. Lithological units in legend are presented in Table S1.

**Table S1.** Lithostratigraphic types.

| Lithological unit | Description                                                                          | Geological era |
|-------------------|--------------------------------------------------------------------------------------|----------------|
| Q <sub>4</sub>    | Quaternary Holocene alluvium and lacustrine deposits                                 | Quaternary     |
| Q <sub>2</sub>    | Quaternary Holocene alluvium and lacustrine deposits                                 | Quaternary     |
| Q <sub>1</sub>    | Lake deposit I: feldspathic coarse sand, clay, peat. Alluvial f: gravel              | Quaternary     |
| E                 | Union layer                                                                          | Paleogene      |
| K <sub>2</sub>    | Mesozoic Upper Cretaceous red sandstone, calcareous mudstone, and sandy conglomerate | Cretaceous     |
| K <sub>1</sub>    | Red siltstone, mudstone, sand conglomerate, basalt                                   | Cretaceous     |
| J <sub>2</sub>    | Red mudstone, silty conglomerate, sandy limestone, conglomerate                      | Jurassic       |
| J <sub>1+2</sub>  | Sandstone, feldspar quartz sandstone, red mudstone, siltstone                        | Jurassic       |
| J <sub>1</sub>    | Sandstone, feldspar quartz sandstone, shale, conglomerate, basalt                    | Jurassic       |
| T <sub>3</sub>    | Conglomerate, mudstone, shale, quartz conglomerate                                   | Triassic       |
| T <sub>2</sub>    | Variegated calcareous mudstone, siltstone, dolomite                                  | Triassic       |

|                              |                                                                                                                                                                                     |                            |
|------------------------------|-------------------------------------------------------------------------------------------------------------------------------------------------------------------------------------|----------------------------|
| T <sub>1</sub>               | Sandstone, mudstone, shale, quartz conglomerate, coal bearing                                                                                                                       | Triassic                   |
| P <sub>2</sub>               | Longtan Formation and Wujiaping limestone union                                                                                                                                     | Permian                    |
| P <sub>1+2</sub>             | Liangshan Formation, Qixia limestone, Maokou limestone, Longtan Formation, Dalong Formation                                                                                         | Permian                    |
| P <sub>1</sub>               | Liangshan Formation, Qixia Formation, Maokou limestone union                                                                                                                        | Permian                    |
| P                            | Upper Series: siliceous rock, shale, limestone, sandstone<br>Lower Series: Chert limestone, magnesium marl                                                                          | Permian                    |
| C <sub>2</sub>               | Limestone, marl, sandstone, shale                                                                                                                                                   | Carboniferous              |
| C <sub>1</sub>               | Limestone, dolomite                                                                                                                                                                 | Carboniferous              |
| D <sub>2</sub> C             | Middle and upper Devonian and Carboniferous co-stratification                                                                                                                       | -                          |
| D <sub>3</sub>               | Marl, limestone, sandstone, shale, hematite                                                                                                                                         | Devonian                   |
| D <sub>2+3</sub>             | Union layer                                                                                                                                                                         | Devonian                   |
| D <sub>2</sub>               | The upper part is limestone and dolomite; The lower part is sandstone and sand conglomerate                                                                                         | Devonian                   |
| D <sub>1</sub>               | Purple sandstone, shale, sand conglomerate                                                                                                                                          | Devonian                   |
| S <sub>2+3</sub>             | Union layer                                                                                                                                                                         | Siluric                    |
| S <sub>1</sub>               | Shallow metamorphic fine sandstone, slate                                                                                                                                           | Siluric                    |
| S                            | Siltstone, shale, sandy limestone, shell limestone                                                                                                                                  | Siluric                    |
| O <sub>3</sub>               | Black shale, siliceous rock, feldspar quartz sandstone, shale                                                                                                                       | Ordovician                 |
| O <sub>2</sub>               | Limestone, marl, shallow metamorphic siltstone                                                                                                                                      | Ordovician                 |
| O <sub>1</sub>               | Limestone, dolomite with shale, calcareous slate, shallow metamorphic siltstone                                                                                                     | Ordovician                 |
| O                            | Union layer                                                                                                                                                                         | Ordovician                 |
| Є <sub>3</sub>               | Dolomite, lime dolomite, limestone                                                                                                                                                  | Cambrian                   |
| Є <sub>2+3</sub>             | Middle series and upper series parallel layer                                                                                                                                       | Cambrian                   |
| Є <sub>2</sub>               | Limestone, dolomite and shale                                                                                                                                                       | Cambrian                   |
| Є <sub>1</sub>               | Limestone, marl, shale, carbonaceous shale                                                                                                                                          | Cambrian                   |
| Є                            | Union layer                                                                                                                                                                         | Cambrian                   |
| Z <sub>2</sub>               | Limestone, dolomite, siliceous rock, mafic rock                                                                                                                                     | Sinian                     |
| Z <sub>1</sub>               | Pebbly mudstone, slate, arkose                                                                                                                                                      | Sinian                     |
| Z                            | Union layer                                                                                                                                                                         | Sinian                     |
|                              | Nishi Group: metamorphic sandstone, gravel sandstone, slate                                                                                                                         |                            |
| Pt <sub>3</sub> <sup>1</sup> | Banxi Group: purple red slate, metamorphic sandstone, limestone, sand-bearing conglomerate<br>Gaojian Group: black slate, metamorphic sandstone, tuff, sand containing conglomerate | Upper Proterozoic          |
| Pt <sub>2</sub>              | Lengjiayi Group: slate, metamorphic sandstone, andesite, basalt, volcanic rock                                                                                                      | Mesoproterozoic            |
| Oπ <sub>5</sub> <sup>3</sup> | Quartz porphyry                                                                                                                                                                     | Yanshanian Cretaceous      |
| γπ <sub>5</sub> <sup>3</sup> | Granite porphyry                                                                                                                                                                    | Yanshanian Cretaceous      |
| γη <sub>5</sub> <sup>2</sup> | Monzonitic granite                                                                                                                                                                  | Yanshanian Jurassic        |
| γδ <sub>5</sub> <sup>2</sup> | Granodiorite                                                                                                                                                                        | Yanshanian Jurassic        |
| γη <sub>3</sub> <sup>3</sup> | Granodiorite                                                                                                                                                                        | Caledonian Silurian System |
| Bμ <sub>2</sub> <sup>2</sup> | Diabase                                                                                                                                                                             | Middle Proterozoic         |
| β                            | Basalt                                                                                                                                                                              | -                          |
| γ                            | Granite                                                                                                                                                                             | -                          |

**Table S2.** Statistics characteristics of the heavy metal(loid)s ( $\text{mg} \cdot \text{kg}^{-1}$ ).

|                       | Cr                | Cd                | As                | Pb                 | Hg                |
|-----------------------|-------------------|-------------------|-------------------|--------------------|-------------------|
| Mean $\pm$ SD         | 75.65 $\pm$ 30.45 | 0.77 $\pm$ 4.18   | 19.18 $\pm$ 43.94 | 57.96 $\pm$ 144.08 | 0.18 $\pm$ 1.61   |
| Median                | 71.96             | 0.41              | 14                | 39.9               | 0.12              |
| Minimum               | 2.71              | 0                 | 0.67              | 1.51               | 0                 |
| Maximum               | 1281              | 417.5             | 3782.1            | 9763               | 235.7             |
| Skewness              | 7.2               | $5.3 \times 10^1$ | $3.4 \times 10^1$ | $3.4 \times 10^1$  | $1.1 \times 10^2$ |
| Kurtosis              | $2.1 \times 10^2$ | $1.8 \times 10^3$ | $3.8 \times 10^3$ | $1.9 \times 10^3$  | $1.3 \times 10^4$ |
| C.V.                  | 0.4               | 5.41              | 2.29              | 2.49               | 8.94              |
| Background values     | 67<br>[1]         | 0.08<br>[1]       | 14<br>[1]         | 27<br>[1]          | 0.09<br>[1]       |
| Risk control standard | 150               | 0.3               | 20                | 70                 | 0.5               |

**Table S3.** Risk screening values for soil contamination of agricultural land ( $\text{mg} \cdot \text{kg}^{-1}$ ).

| Pollutant | Type   | pH $\leq$ 5.5 | 5.5<pH $\leq$ 6.5 | 6.5<pH $\leq$ 7.5 | pH>7.5 |
|-----------|--------|---------------|-------------------|-------------------|--------|
| Cr        | Paddy  | 250           | 250               | 300               | 350    |
|           | Others | 150           | 150               | 200               | 250    |
| Cd        | Paddy  | 0.3           | 0.4               | 0.6               | 0.8    |
|           | Others | 0.3           | 0.3               | 0.3               | 0.6    |
| As        | Paddy  | 30            | 30                | 25                | 20     |
|           | Others | 40            | 40                | 30                | 25     |
| Pb        | Paddy  | 80            | 100               | 140               | 240    |
|           | Others | 70            | 90                | 120               | 170    |
| Hg        | Paddy  | 0.5           | 0.5               | 0.6               | 1.0    |
|           | Others | 1.3           | 1.8               | 2.4               | 3.4    |

**Table S4.** The classification criteria for the assessment of soil heavy metal(loid) pollution assessment.

| Level | Nemerow index        | Degree of Contamination  |
|-------|----------------------|--------------------------|
| 1     | $P_n \leq 0.7$       | Uncontaminated           |
| 2     | $0.7 < P_n \leq 1.0$ | Warning Level of Caution |
| 3     | $1.0 < P_n \leq 2.0$ | Low contamination        |
| 4     | $2.0 < P_n \leq 3.0$ | Moderate contamination   |
| 5     | $P_n > 3.0$          | High contamination       |

**Table S5.** The probabilistic distribution of exposure parameters for human health risk assessment.

| Parameters                           | Unit                              | Probabilistic Distribution | Children                     | Adults                         | Reference |
|--------------------------------------|-----------------------------------|----------------------------|------------------------------|--------------------------------|-----------|
| Ingestion rate ( $IR_{\text{ing}}$ ) | $\text{mg} \cdot \text{d}^{-1}$   | lognormal                  | 50th: 113.6<br>95th: 275.5   | 50th: 72.2<br>95th: 187.6      | [2]       |
| Exposure frequency (EF)              | $\text{d} \cdot \text{year}^{-1}$ | point                      | 350                          | 350                            | [3]       |
| Exposure duration (ED)               | year                              | uniform                    | (5,6)                        | (19-44)                        | [2]       |
| Skin adherence factor (AF)           | $\text{mg} \cdot \text{cm}^{-1}$  | Beta                       | 0.2(0, 3.3)                  | 0.07(0, 0.3)                   | [4]       |
| Skin area exposed to soils (SA)      | $\text{cm}^2$                     | Lognormal                  | 50th: 7970.8<br>95th: 9290.1 | 50th: 15922.0<br>95th: 18730.0 | [2]       |
| Dermal adsorption factor (ABS)       | –                                 | point                      | 0.001(As:0.03)               | 0.001(As:0.03)                 | [4]       |
| Average body weight (BW)             | kg                                | lognormal                  | 50th:19.3<br>95th:24.5       | 50th:60.1<br>95th:80.6         | [2]       |
| Average time (AT)                    | NCR(d)                            | point                      | ED $\times$ 365              | ED $\times$ 365                | [4]       |
|                                      | CR(d)                             | point                      | 70 $\times$ 365              | 70 $\times$ 365                |           |

**Table S6.** References dose (RfD,  $\text{mg}\cdot(\text{kg}\cdot\text{d})^{-1}$ ) and slope factor (SF,  $\text{mg}\cdot(\text{kg}\cdot\text{d})^{-1}$ ) of human health risk assessment through different pathways.

| Parameters            | As                    | Cd                    | Cr                    | Pb                    | Hg                    |
|-----------------------|-----------------------|-----------------------|-----------------------|-----------------------|-----------------------|
| RfD <sub>ing</sub>    | $3.00 \times 10^{-4}$ | $1.00 \times 10^{-3}$ | $3.00 \times 10^{-3}$ | $3.50 \times 10^{-3}$ | $3.00 \times 10^{-4}$ |
| RfD <sub>dermal</sub> | $1.23 \times 10^{-4}$ | $1.00 \times 10^{-5}$ | $6.00 \times 10^{-5}$ | $5.25 \times 10^{-4}$ | $2.14 \times 10^{-5}$ |
| SF <sub>ing</sub>     | 1.50                  | $5.01 \times 10^{-1}$ | $5.00 \times 10^{-1}$ | –                     | –                     |
| SF <sub>dermal</sub>  | 3.66                  | 20                    | 20                    | –                     | –                     |
| Reference             | [5]                   | [5]                   | [3]                   | [5]                   | [6]                   |

**Table S7.** The interaction type and criterion between factor  $X_1$  and factor  $X_2$ .

|   | Type of Interaction             | Judging Description                                                         |
|---|---------------------------------|-----------------------------------------------------------------------------|
| 1 | Nonlinearly weakened            | $q(X_1 \cap X_2) < \text{Min}(q(X_1), q(X_2))$                              |
| 2 | Univariate nonlinearly weakened | $\text{Min}(q(X_1), q(X_2)) < q(X_1 \cap X_2) < \text{Max}(q(X_1), q(X_2))$ |
| 3 | Bivariate enhanced              | $q(X_1 \cap X_2) > \text{Max}(q(X_1), q(X_2))$                              |
| 4 | Independent                     | $q(X_1 \cap X_2) = q(X_1) + q(X_2)$                                         |
| 5 | Nonlinearly enhanced            | $q(X_1 \cap X_2) > q(X_1) + q(X_2)$                                         |

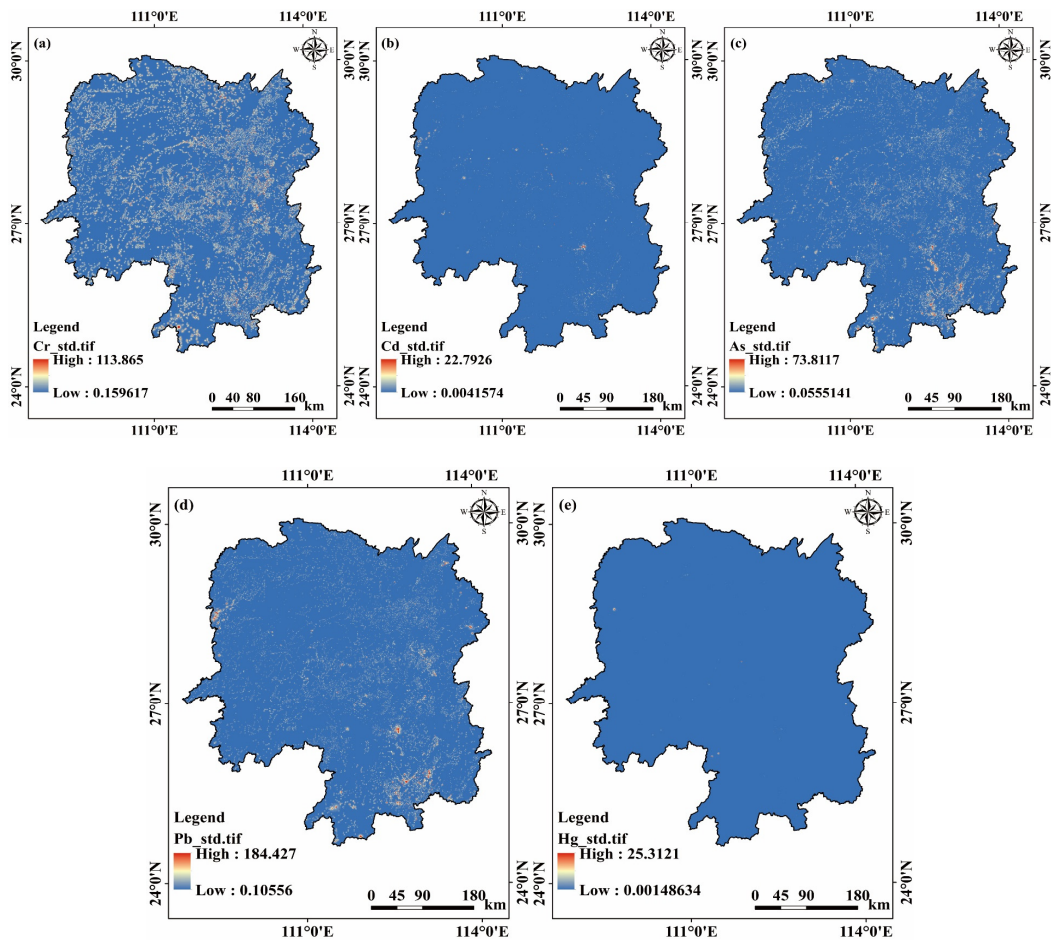

**Figure S2.** Uncertainty of location and concentration of heavy metal(loid)s of (a) Cr, (b) Cd, (c) As, (d) Pb, and (e) Hg.

## References

1. Li, X.Z.; Zhao, Z.Q.; Yuan, Y.; Wang, X.; Li, X.Y. Heavy metal accumulation and its spatial distribution in agricultural soils: Evidence from Hunan province, China. *RSC Adv.* **2018**, *8*, 10665–10672. <https://doi.org/10.1039/c7ra12435j>.
2. Zhang, H.; Zhang, F.; Song, J.; Tan, M.L.; Kung, H.-t.; Johnson, V.C. Pollutant source, ecological and human health risks assessment of heavy metals in soils from coal mining areas in Xinjiang, China. *Environ. Res.* **2021**, *202*, 111702. <https://doi.org/10.1016/j.envres.2021.111702>.
3. Liu, Z.; Du, Q.; Guan, Q.; Luo, H.; Shan, Y.; Shao, W. A Monte Carlo simulation-based health risk assessment of heavy metals in soils of an oasis agricultural region in northwest China. *Sci. Total Environ.* **2023**, *857*, 159543. <https://doi.org/10.1016/j.scitotenv.2022.159543>.
4. USEPA. *Exposure Factors Handbook: 2011 Edition*; EPA/600/R-090/052F; U.S. Environmental Protection Agency, Office of Research and Development, National Center for Environmental Assessment: Washington, DC, USA, 2011.
5. Guo, G.; Li, K.; Lei, M. Accumulation, environmental risk characteristics and associated driving mechanisms of potential toxicity elements in roadside soils across China. *Sci. Total Environ.* **2022**, *835*, 155342. <https://doi.org/10.1016/j.scitotenv.2022.155342>.
6. Liu, H.; Zhang, Y.; Yang, J.; Wang, H.; Li, Y.; Shi, Y.; Li, D.; Holm, P.E.; Ou, Q.; Hu, W. Quantitative source apportionment, risk assessment and distribution of heavy metals in agricultural soils from southern Shandong Peninsula of China. *Sci. Total Environ.* **2021**, *767*, 144879. <https://doi.org/10.1016/j.scitotenv.2020.144879>.
